# Supplementary material for: Transcriptome dynamics through alternative polyadenylation in developmental and environmental responses in plants revealed by deep sequencing
Source: HighWire-hosted journal article supplement (doi:10.1101/gr.114744.110), 2011-08-03
Supplement: Supplemental_Data_S1.pdf [file Supplemental_Data_S1.pdf]

Supplemental Data S1. Distribution of tissue specific events among different APA classes

| APA-class | Alternative transcript events          | Tissue specific event in Arabidopsis | Tissue specific event in rice using MPSS | Tissue specific event in rice using DGE |
|-----------|----------------------------------------|--------------------------------------|------------------------------------------|-----------------------------------------|
| 1         | 3' UTR                                 | 928 (9%)                             | 5980 (27%)                               | 4864 (22%)                              |
| 2         | upstream of stop codon                 | 1150 (11%)                           | 1791 (24%)                               | 1533 (21%)                              |
| 3         | Exclusively upstream of stop codon     | 4175 (36%)                           | 3299 (42%)                               | 3821 (48%)                              |
| 4         | Exclusively in an exon except last one | 1814 (39%)                           | 2302 (36%)                               | 2580 (40%)                              |
| 5         | Last coding Exon                       | 1863 (38%)                           | 1663 (45%)                               | 1894 (51%)                              |
| 6         | Exclusively Intron                     | 38 (38%)                             | 367 (39%)                                | 471 (49%)                               |
| 7         | In intron                              | 399 (32%)                            | 772 (43%)                                | 1147 (64%)                              |
| 8         | 5'UTR                                  | 841 (41%)                            | 1291 (42%)                               | 1532 (50%)                              |
