# Supplementary material for: Transcriptome dynamics through alternative polyadenylation in developmental and environmental responses in plants revealed by deep sequencing
Source: HighWire-hosted journal article supplement (doi:10.1101/gr.114744.110), 2011-08-03
Supplement: Supplemental_Data_S3_Table_S1S2_June_14.pdf [file Supplemental_Data_S3_Table_S1S2_June_14.pdf]

## Shen et al., Supplemental Data S3

### Relationship of APA and the expression levels of *trans*-acting factors

It is well known that some polyadenylation-related protein factors play crucial roles in 3'-end formation (Simpson et al. 2003; Xing et al. 2008; Zhang et al. 2008), and mRNA splicing is also known to play a role in polyadenylation (Millevoi et al. 2006; Tian et al. 2007). To further determine the basis for the different usage of APA sites in different tissue types, we examined the expression level of known polyadenylation factors and splicing factors in each MPSS-DGE library. The hypothesis was that different expression levels of these *trans*-acting factors might correspond to different APA levels among different libraries. Since Arabidopsis has more libraries showing significant differences in APA site usages (Supplemental Data S2) and the polyadenylation factors are better understood than those in rice, we only used the polyadenylation factors of Arabidopsis in this study. We did not use signatures in the five oldest libraries sequenced by the "classic" MPSS-DGE method to make sure that comparisons between libraries are not affected by sequencing methods. In 12 libraries, the TPM values were used as the expression levels of genes involved. The 24 known Arabidopsis polyadenylation factors (Hunt et al. 2008a) and expression value of 19 splicing factors (Campbell et al. 2006) were examined in the same 12 libraries obtained from Arabidopsis MPSS-DGE databases.

To find genes that are critical to the library-specific behavior of APA, we used a Spearman correlation to calculate the correlation of each gene's expression value with different usage of APA. We further categorized APA into two conditions, APA found in exons (classes 4, 5 and 6), and APA associated with alternative splicing (classes 6 and 7). In the first case, several polyadenylation genes *PCFS1*, *U2AF65*, *PAPS4* and *PABN3*, were found to have a positive correlation with the increased usage of library-specific APA (Supplemental Table S1; detail expression value of each genes are in Supplemental Table S2). Meanwhile *CFIS25*, *SYM2* and *PABN2* have positive APA effect in introns. This result correlates with some previous findings using traditional experimental methods. For example, *PCFS4*, a homologue of yeast polyadenylation factor Protein 1 of Cleavage Factor 1 (*Pcf11p*), is the only gene on the list significantly correlated with APA (Pearson correlation test,  $p < 0.05$ ) in exons and introns and is

also known to regulate flowering time through regulation of APA (Xing et al. 2008). The splicing factor U2AF65 was recently associated with the splicing of the last exon and polyadenylation, through its interaction with polyadenylation factor CFI-m in mammals (Millevoi et al. 2006). Moreover, the homologue of CFI-m in Arabidopsis, *CFIS25*, may also be implicated here as it demonstrates a positive correlation with APA in introns.

It was surprising to see there were no genes on the list for which their expression level is significantly correlated with APA (Pearson correlation test,  $p < 0.05$ ) in both exons and introns (Supplemental Table S2). This result suggests a possibility that these events could be mutually exclusive, and the expression of, rather than lack thereof, certain genes may promote APA in some tissues. While the result may also validate our analysis protocols, the correlations warrant further studies to reveal more specific relationships between polyadenylation and splicing factors and particular library preference towards APA.

## Method

To study which *trans*-acting factors play a role in determination of usage of APA in Arabidopsis, we identified known polyadenylation and splicing factors (Campbell et al. 2006; Hunt et al. 2008b). For each library, expression levels of each factor were determined by the total number of TPMs (without considering the number of signatures each gene has) and expression values from all libraries were compared with relative distance calculated in the previous section. Spearman correlation values for each gene were calculated by comparing the expression value of the gene with the preference of APA discussed in previous paragraph. We classified the APA preference into two groups: an exon-related group that includes signatures from APA classes 4, 5 and 6 and an intron-related group from APA classes 6 and 7. Genes with  $p$ -values  $< 0.1$  were considered significant.

**Table S1.** List of polyadenylation or splicing related proteins found to be correlated with the usage of APA in exons or introns. Library specific expression value of all known polyadenylation or splicing factors are compared with APA-class usages in same library (see Figure 3) using Spearman correlation method.

| Gene ID          | Name          | <i>p</i> -value-exon <sup>a</sup> | <i>rho</i> -value-exon <sup>b</sup> | <i>p</i> -value-Intron <sup>a</sup> | <i>rho</i> -value-Intron <sup>b</sup> |
|------------------|---------------|-----------------------------------|-------------------------------------|-------------------------------------|---------------------------------------|
| <i>AT4G32850</i> | <i>PAPS4</i>  | 0.068                             | 0.545                               | 0.044                               | 0.594                                 |
| <i>AT4G36690</i> | <i>U2AF65</i> | 0.017                             | 0.670                               | -                                   | -                                     |
| <i>AT1G66500</i> | <i>PCFS1</i>  | 0.075                             | 0.531                               | -                                   | -                                     |
| <i>AT5G10350</i> | <i>PABN3</i>  | 0.077                             | 0.531                               | -                                   | -                                     |
| <i>AT5G51120</i> | <i>PABN2</i>  | -                                 | -                                   | 0.009                               | 0.708                                 |
| <i>AT1G27595</i> | <i>SYM2</i>   | -                                 | -                                   | 0.056                               | 0.562                                 |
| <i>AT4G25550</i> | <i>CFIS2</i>  | -                                 | -                                   | 0.072                               | 0.535                                 |

<sup>a</sup>*p*-value and <sup>b</sup>*rho*-value (Spearman ranking) were calculated based on expression values of the protein coding genes and APA usages in the 12 Arabidopsis libraries using Spearman correlation methods.

Supplemental Table S2. The expression values (tag numbers) of polyadneylation and splicing related genes in Arabidopsis associated with each library.

| Gene ID   | Name            | AP1 | AP3 | AGM | INS | ROS | SAP | S04 | S52 | LES | GSE | CAS | SIS | p-value  | rho-exon   | pvalue-intrc | rho-intron |
|-----------|-----------------|-----|-----|-----|-----|-----|-----|-----|-----|-----|-----|-----|-----|----------|------------|--------------|------------|
| AT5G51660 | CPSF160         | 26  | 22  | 11  | 25  | 15  | 1   | 51  | 9   | 48  | 17  | 25  | 16  | 0.672054 | -0.1366027 | 0.556033     | -0.189142  |
| AT5G23880 | CPSF100,ESP5    | 61  | 33  | 28  | 41  | 63  | 36  | 24  | 2   | 10  | 5   | 26  | 9   | 0.450277 | 0.2377622  | 0.477883     | 0.223776   |
| AT1G61010 | CPSF73-I        | 16  | 24  | 19  | 54  | 28  | 20  | 3   | 7   | 7   | 1   | 18  | 15  | 0.541214 | 0.1961474  | 0.533867     | 0.19965    |
| AT1G30460 | CPSF30,OXT6     | 5   | 16  | 18  | 16  | 1   | 31  | 0   | 0   | 4   | 0   | 24  | 0   | 0.587049 | 0.1747216  | 0.211804     | 0.388667   |
| AT1G17760 | CSTF77          | 17  | 12  | 27  | 21  | 17  | 48  | 4   | 20  | 38  | 12  | 39  | 29  | 0.786327 | -0.0877198 | 0.695662     | 0.126317   |
| AT1G71800 | CSTF64          | 0   | 0   | 0   | 0   | 0   | 0   | 0   | 0   | 0   | 0   | 22  | 0   | 0.684849 | -0.1310139 | 0.206256     | 0.393042   |
| AT5G60940 | CSTF50          | 40  | 56  | 22  | 27  | 24  | 13  | 14  | 0   | 48  | 2   | 64  | 56  | 0.931114 | -0.0280211 | 0.504913     | 0.213661   |
| AT5G13480 | FY              | 0   | 4   | 0   | 2   | 5   | 0   | 0   | 0   | 0   | 0   | 2   | 5   | 0.799433 | 0.0822373  | 0.485576     | 0.223216   |
| AT1G17980 | PAPS1           | 6   | 6   | 10  | 6   | 38  | 8   | 3   | 5   | 6   | 0   | 17  | 0   | 0.732356 | 0.1105382  | 0.526366     | 0.203248   |
| AT2G25850 | PAPS2           | 7   | 37  | 17  | 29  | 24  | 23  | 0   | 18  | 61  | 0   | 35  | 12  | 0.347292 | 0.2977237  | 0.854155     | 0.059545   |
| AT4G32850 | PAPS4           | 44  | 75  | 46  | 74  | 139 | 107 | 41  | 17  | 64  | 49  | 174 | 29  | 0.068633 | 0.5454545  | 0.044262     | 0.594406   |
| AT3G66652 | FIPS3           | 12  | 19  | 9   | 6   | 9   | 0   | 0   | 0   | 0   | 0   | 0   | 0   | 0.518389 | 0.2070976  | 0.74418      | 0.105503   |
| AT4G25550 | CFIS2           | 33  | 36  | 6   | 28  | 60  | 59  | 0   | 0   | 3   | 0   | 78  | 45  | 0.539027 | 0.197188   | 0.072939     | 0.535225   |
| AT4G29820 | CFIS1           | 0   | 0   | 0   | 0   | 0   | 0   | 0   | 0   | 0   | 0   | 6   | 0   | 0.684849 | -0.1310139 | 0.206256     | 0.393042   |
| AT3G04680 | CLPS3           | 1   | 4   | 0   | 16  | 15  | 5   | 0   | 0   | 16  | 0   | 26  | 3   | 0.387789 | 0.2745626  | 0.387789     | 0.274563   |
| AT1G66500 | PCFS1           | 0   | 8   | 0   | 5   | 0   | 0   | 0   | 5   | 10  | 14  | 0   | 0   | 0.075394 | 0.5314203  | 0.856417     | 0.058613   |
| AT4G04885 | PCFS4           | 14  | 6   | 2   | 9   | 10  | 0   | 0   | 0   | 17  | 1   | 5   | 22  | 0.810877 | 0.0774667  | 0.930749     | 0.02817    |
| AT5G43620 | PCFS5           | 0   | 0   | 0   | 0   | 0   | 0   | 0   | 0   | 0   | 0   | 0   | 4   | 0.333893 | -0.3056992 | 0.8928       | -0.043671  |
| AT5G10350 | PABN3           | 48  | 113 | 53  | 125 | 132 | 14  | 6   | 63  | 54  | 80  | 64  | 8   | 0.07708  | 0.5314685  | 0.313863     | 0.314685   |
| AT5G51120 | PABN2           | 32  | 47  | 57  | 41  | 29  | 55  | 13  | 19  | 13  | 52  | 74  | 32  | 0.518551 | 0.2070188  | 0.009865     | 0.708776   |
| AT5G65260 | PABN1           | 5   | 4   | 15  | 15  | 59  | 4   | 0   | 37  | 8   | 13  | 11  | 26  | 0.63974  | -0.1508781 | 0.679528     | -0.133334  |
| AT5G01400 | ESP4,SYM5       | 27  | 45  | 40  | 64  | 61  | 86  | 58  | 14  | 19  | 6   | 160 | 22  | 0.86898  | -0.0559441 | 0.477883     | 0.223776   |
| AT1G27590 | SYM1            | 0   | 0   | 0   | 5   | 0   | 0   | 0   | 0   | 0   | 0   | 0   | 0   | 0.8928   | -0.0436713 | 0.684849     | -0.131014  |
| AT1G27595 | SYM2            | 38  | 35  | 8   | 35  | 11  | 45  | 0   | 0   | 38  | 20  | 170 | 66  | 0.461214 | 0.2355042  | 0.056984     | 0.562398   |
| AT5G09880 | PUF60I          | 18  | 16  | 13  | 3   | 1   | 15  | 0   | 0   | 2   | 0   | 0   | 1   | 0.356407 | 0.2923913  | 0.634252     | 0.153327   |
| AT5G51660 | PUF60II         | 26  | 22  | 11  | 25  | 15  | 1   | 51  | 9   | 48  | 17  | 25  | 16  | 0.672054 | -0.1366027 | 0.556033     | -0.189142  |
| AT5G11170 | UAP56I          | 5   | 6   | 9   | 11  | 1   | 2   | 0   | 43  | 3   | 22  | 0   | 0   | 0.375065 | 0.2816971  | 0.913488     | -0.035212  |
| AT5G11200 | UAP56II         | 2   | 6   | 4   | 9   | 0   | 0   | 0   | 0   | 3   | 9   | 6   | 0   | 0.276412 | 0.342092   | 0.175728     | 0.418517   |
| AT5G51300 | SFI             | 54  | 92  | 73  | 90  | 18  | 32  | 2   | 9   | 21  | 31  | 68  | 26  | 0.410431 | 0.2587413  | 0.112478     | 0.482518   |
| AT1G14650 | SF3AI           | 20  | 81  | 40  | 50  | 46  | 14  | 3   | 21  | 27  | 12  | 33  | 50  | 0.956919 | 0.0175132  | 0.93971      | 0.024518   |
| AT1G14640 | SF3AII          | 0   | 0   | 0   | 0   | 0   | 0   | 0   | 24  | 0   | 0   | 0   | 0   | 0.495367 | -0.2183566 | 0.206256     | -0.393042  |
| AT2G32600 | SF3A, subunit 2 | 19  | 30  | 49  | 46  | 20  | 27  | 23  | 0   | 76  | 5   | 86  | 23  | 0.664076 | -0.1401053 | 0.974145     | 0.010508   |
| AT5G06160 | SF3A60          | 15  | 42  | 26  | 51  | 19  | 56  | 6   | 25  | 11  | 3   | 23  | 14  | 0.774731 | 0.0909091  | 0.724465     | 0.111888   |
| AT5G64270 | SF3B, subunit 1 | 216 | 103 | 95  | 140 | 87  | 53  | 52  | 12  | 200 | 99  | 318 | 59  | 0.360342 | 0.2867133  | 0.165145     | 0.426573   |
| AT4G21660 | SF3B, subunit 2 | 92  | 131 | 100 | 73  | 89  | 31  | 14  | 21  | 36  | 37  | 73  | 145 | 0.871178 | 0.0525395  | 0.341372     | 0.301226   |
| AT5G40340 | SRm300          | 81  | 140 | 100 | 148 | 33  | 123 | 7   | 4   | 46  | 0   | 86  | 24  | 0.643088 | 0.1468531  | 0.535464     | 0.195804   |
| AT3G50670 | U1 70K          | 159 | 165 | 216 | 169 | 155 | 120 | 75  | 70  | 135 | 66  | 108 | 99  | 0.92992  | 0.027972   | 0.886335     | -0.048951  |
| AT2G43370 | U1 70K          | 0   | 1   | 0   | 1   | 2   | 1   | 0   | 0   | 0   | 0   | 0   | 0   | 0.094565 | 0.5042729  | 0.453361     | 0.23953    |
| AT1G60900 | U2AF65          | 45  | 101 | 107 | 114 | 43  | 21  | 0   | 5   | 43  | 0   | 109 | 85  | 0.616271 | -0.1614045 | 0.671506     | 0.136843   |
| AT4G36690 | U2AF65          | 35  | 40  | 4   | 38  | 0   | 25  | 0   | 15  | 37  | 50  | 25  | 2   | 0.01709  | 0.6701796  | 0.10773      | 0.487722   |
| AT1G27650 | U2AF35          | 139 | 80  | 83  | 109 | 167 | 29  | 18  | 113 | 70  | 18  | 223 | 6   | 0.974145 | 0.0105079  | 0.736944     | 0.108582   |
| AT5G42820 | U2AF35          | 134 | 156 | 166 | 107 | 251 | 48  | 28  | 57  | 89  | 89  | 136 | 85  | 0.497785 | 0.2171632  | 0.347292     | 0.297724   |
| AT1G10320 | U2AF35          | 4   | 4   | 1   | 9   | 5   | 0   | 0   | 0   | 2   | 0   | 0   | 0   | 0.404218 | 0.2655249  | 0.826308     | -0.071056  |
