# Supplementary material for: Transcriptome dynamics through alternative polyadenylation in developmental and environmental responses in plants revealed by deep sequencing
Source: HighWire-hosted journal article supplement (doi:10.1101/gr.114744.110), 2011-08-03

**Shen et al Fig S1.** Signature distribution and frequency of different APA-classes. The patterned bar shows fraction of unique signatures in each class out of total unique signatures (%), indicative of distributions of signature classes. The black bar indicates percentage of signature count in each class out of total signatures, indicative of expression level of each class. For example, 40% of the total Arabidopsis mRNA molecules use APA-class 1, but only 21% of all poly(A) sites are used by these transcripts. A. MPSS signatures from Arabidopsis. B. MPSS signatures from rice. C. DGE signatures from rice.

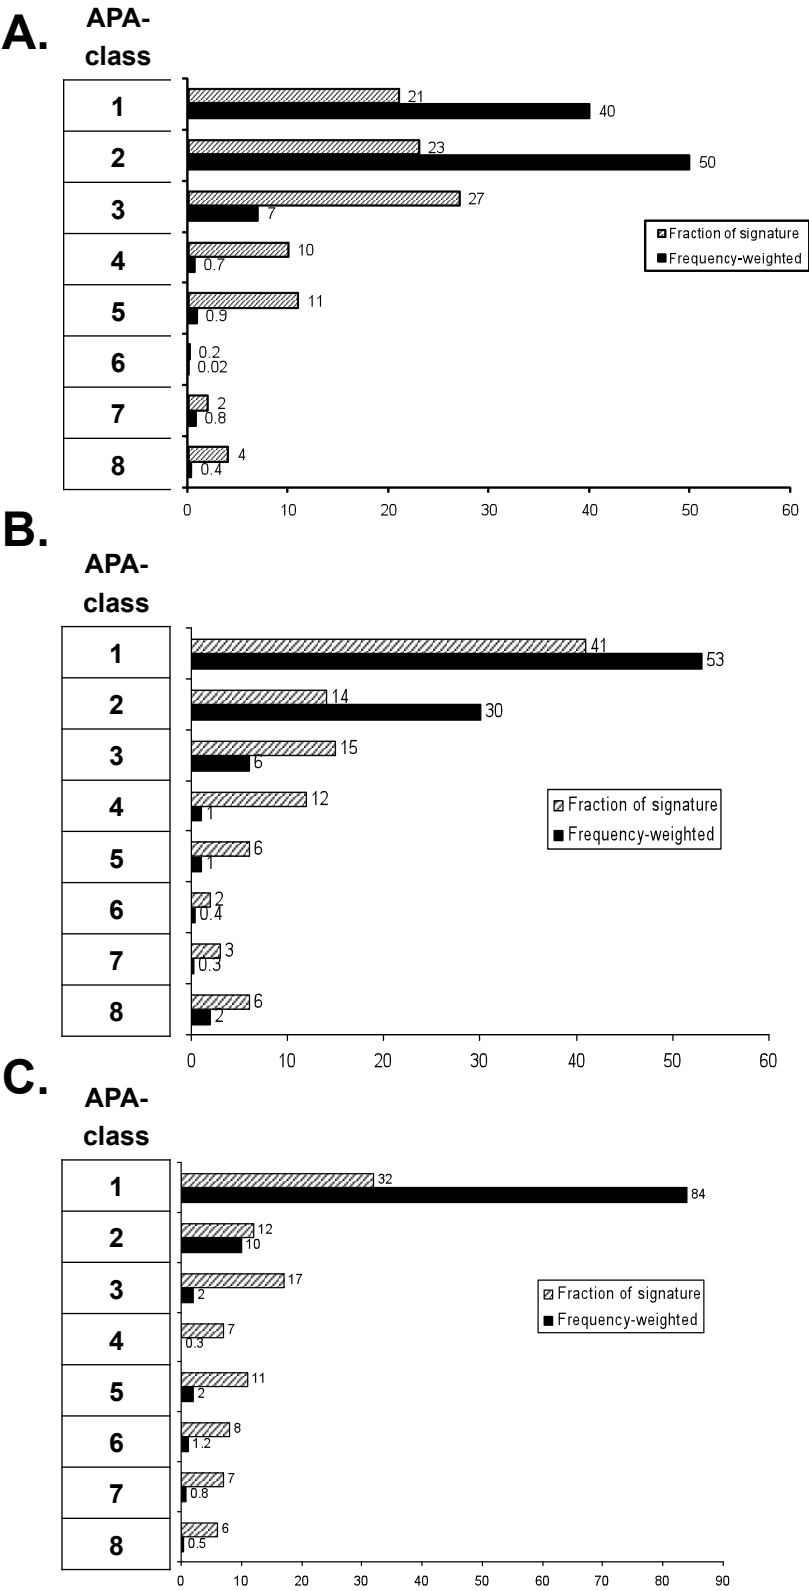

Supplement: Supplementary_figure_S1.pdf [file Supplementary_figure_S1.pdf]
